# Supplementary material
Source: PubMed Central journal article supplement (PMC3748968)
Supplement: jbjs_95_4_297_ds01.pdf [file jbjs_95_4_297_ds01.pdf]

TABLE E-1 Causality Assessment (Naranjo Criteria) of Published Case Reports of Atypical Femoral Fractures Associated with Bisphosphonate Use<sup>24\*</sup>

| Study                                    | No. | Sex, Age Range   | Fracture Type                                          | Agent | Duration of BP Use (yr) | Biopsy Results                                                                          | Comorbidities        | Concomitant Medicines                      | Fracture-Healing     | Naranjo ADR Probability Score <sup>22</sup> |
|------------------------------------------|-----|------------------|--------------------------------------------------------|-------|-------------------------|-----------------------------------------------------------------------------------------|----------------------|--------------------------------------------|----------------------|---------------------------------------------|
| Odvina (2005) <sup>7</sup>               | 5   | Female, 49-76 yr | Femoral diaphysis, subtrochanteric bilateral fractures | ALN   | 3-8                     | Decreased bone formation rate, decreased osteoblasts, low bone resorption               | Unclear              | Prednisone 11 yr (n = 1), estrogen (n = 1) | 3 mo-2 yr            | 4 (possible ADR)                            |
| Husada (2005) <sup>119</sup>             | 1   | Female           | Femoral diaphysis                                      | ALN   |                         | None                                                                                    |                      |                                            |                      | 4 (possible ADR)                            |
| Armamento-Villareal (2006) <sup>95</sup> | 1   | Male             | Subtrochanteric fracture                               | ALN   | 5                       | SSBT                                                                                    | None                 | None                                       | Delayed              | 7 (probable ADR)                            |
| Schneider (2006) <sup>120</sup>          | 1   | Female           | Femur diaphysis                                        | ALN   |                         | None                                                                                    |                      |                                            |                      |                                             |
| Lee (2007) <sup>121</sup>                | 1   | Female           | Femoral diaphysis                                      | ALN   |                         | None                                                                                    |                      |                                            |                      | 3 (possible ADR)                            |
| Cheung (2007) <sup>55</sup>              | 1   | Female, 82 yr    | Femoral diaphysis                                      | ALN   | 10                      | SSBT                                                                                    | None                 | None                                       |                      | 5 (probable ADR)                            |
| Goh (2007) <sup>24</sup>                 | 9   | Female, 44-71 yr | Femoral diaphysis                                      | ALN   | 2.5-5                   | None                                                                                    |                      |                                            |                      | 4 (possible ADR)                            |
| Demiralp (2007) <sup>122</sup>           | 1   | Female, 65 yr    | Femoral diaphysis bilateral                            | ALN   | 7                       | None                                                                                    | Empty sella syndrome | Hydrocortisone, thyroxine                  |                      | 4 (possible ADR)                            |
| Lee (2008) <sup>123</sup>                | 1   | Female, 73 yr    | Femoral diaphysis                                      | ALN   | 1.5                     | None                                                                                    |                      |                                            |                      | 3 (possible ADR)                            |
| Visekruna (2008) <sup>96</sup>           | 3   | Female, 51-72 yr | Femoral metaphysis                                     | ALN   | 5-10                    | Increased osteoclastic activity, decreased connectivity, decreased activation frequency | RA, Crohn disease    | Prednisone, raloxifene, estrogen           | Delayed to 12 months | 5 (probable ADR)                            |
| Kwek (2008) <sup>124</sup>               | 17† | Female, 53-82 yr | Femoral diaphysis                                      | ALN   | 2-7                     | None                                                                                    |                      | Prednisone (n = 2)                         |                      | 5 (probable ADR)                            |

|                                  |     |                      |                                           |          |                           |                                                                                                                |                         |                             |  |                  |
|----------------------------------|-----|----------------------|-------------------------------------------|----------|---------------------------|----------------------------------------------------------------------------------------------------------------|-------------------------|-----------------------------|--|------------------|
| Wernecke (2008) <sup>125</sup>   | 1   | Female, 72 yr        | Femoral diaphysis                         | ZOL-PAM  | 11                        | Hypocellular bone marrow, no evidence of MM, thin sclerotic trabeculae, absence of osteoclasts and osteoblasts | Multiple myeloma        |                             |  | 5 (probable ADR) |
| Neviaser (2008) <sup>26</sup>    | 25‡ | Mean, 74 ± 10 yr     | Femoral diaphysis                         | ALN      | Mean 6.2                  | None                                                                                                           | Osteoporosis            |                             |  | 5 (probable ADR) |
| Sayed-Noor (2008) <sup>126</sup> | 1   | Female, 72 yr        | Subtrochanteric                           | ALN      | 7                         | None                                                                                                           |                         |                             |  | 2 (possible ADR) |
| Bush (2008) <sup>127</sup>       | 1   | Male, 61 yr          | Femoral diaphysis                         | ZOL      | 1.5                       | None                                                                                                           | Prostate cancer         | Chemotherapy, dexamethasone |  | 3 (possible ADR) |
| Lenart (2008) <sup>128</sup>     | 15  | Female               | Femoral diaphysis                         | ALN      | 5.4 ± 2.7                 | None                                                                                                           |                         |                             |  | 3 (possible ADR) |
| Schilcher (2009) <sup>29</sup>   | 5   | Female, >75 yrs      | Femoral diaphysis                         |          | 5.8 (range 3.5-8.5)       | None                                                                                                           |                         |                             |  | 3 (possible ADR) |
| Grasko (2009) <sup>129</sup>     | 2   | Median, 59 yr        | Subtrochanteric (bilateral n = 1)         | PAM, ZOL |                           |                                                                                                                | Myeloma, ONJ            | Chemotherapy, dexamethasone |  | 3 (possible ADR) |
| Glennon (2009) <sup>130</sup>    | 6   | Female, 60-87 yr     | Subtrochanteric, diaphysis                |          | 1.5-15 for ALN, 3 for RIS | None                                                                                                           |                         |                             |  | 4 (probable ADR) |
| Sayed-Noor (2009) <sup>131</sup> | 2   | Female, 48 and 75 yr | Femoral diaphysis                         | ALN      | 10                        | None                                                                                                           | Alcoholic liver disease |                             |  | 3 (possible ADR) |
| Goddard (2009) <sup>132</sup>    | 1   | 67 yr                | Femoral diaphysis (bilateral)             | ALN RIS  | 10                        | None                                                                                                           |                         |                             |  | 3 (possible ADR) |
| Capeci (2009) <sup>133</sup>     | 7   | Female, 53-75 yr     | Subtrochanteric and diaphysis (bilateral) | ALN      | 8.4                       | None                                                                                                           |                         |                             |  | 3 (possible ADR) |
| Lee (2009) <sup>134</sup>        | 1   | Female, 82 yr        | Femoral diaphysis                         | ALN      | 8                         | None                                                                                                           |                         |                             |  | 3 (possible ADR) |
| Leung (2009) <sup>135</sup>      | 6   | Female, 63-78 yr     | Femoral diaphysis                         | ALN      | 0.5-6                     | None                                                                                                           |                         |                             |  | 3 (possible ADR) |

|                                           |    |                    |                                       |                               |                      |                                                                                                      |                                  |                                         |                             |                  |
|-------------------------------------------|----|--------------------|---------------------------------------|-------------------------------|----------------------|------------------------------------------------------------------------------------------------------|----------------------------------|-----------------------------------------|-----------------------------|------------------|
| Schneider (2009) <sup>136</sup>           | 1  | Male, 53 yr        | Subtrochanteric                       | ALN                           | 7                    | None                                                                                                 |                                  |                                         |                             | 3 (possible ADR) |
| Somford (2009) <sup>53</sup>              | 1  | Female             | Bilateral femoral diaphysis           | ALN                           | 8                    | Decreased bone formation (iliac crest) and increased bone resorption (femur)                         | RA                               | Prednisone, infliximab, MTX, omeprazole | Delayed healing at 6 months | 5 (probable ADR) |
| Ing-Lorenzini (2009) <sup>94</sup>        | 8  | 7 female           | Femoral diaphysis                     | ALN (5), ALN/IBN (2), PAM (1) |                      | Partial bone bridging in periosteum, chronic absence of fracture remodeling or healing within cortex | RA, COPD                         | Prednisone (4) PPI (4)                  | Delayed healing             | 5 (probable ADR) |
| Armamento-Villareal (2009) <sup>137</sup> | 8  | Female, mean 54 yr | Femoral diaphysis                     | ALN                           | 4-10                 | SSBT (n = 5)                                                                                         | RA, alcohol abuse, DM II, asthma |                                         |                             | 7 (probable ADR) |
| Cermak (2010) <sup>138</sup>              | 4  | Female             | Subtrochanteric and femoral diaphysis | ALN                           | 5.5-12               | None                                                                                                 | MM (1), breast cancer (1)        |                                         |                             | 4 (possible ADR) |
| Bunning (2010) <sup>139</sup>             | 4  | Female, 49-59 yr   | Femoral diaphysis                     | ALN (2), PAM (1)              | 5-6                  | None                                                                                                 | Myeloma, CAD, hypogonadism       | Chemotherapy, dexamethasone (n = 1)     | Delayed healing (n = 1)     | 4 (possible ADR) |
| Edwards (2010) <sup>140</sup>             | 1  | Female, 60 yr      | Femoral diaphysis (bilateral)         | ALN                           | 6, 8                 | None                                                                                                 | Asthma                           | Prednisolone                            |                             |                  |
| Isaacs (2010) <sup>141</sup>              | 41 | Mean 57 ± 7 yr     | Femoral insufficiency fractures       |                               | 72.5-73.4            | None                                                                                                 |                                  |                                         |                             | 3 (possible ADR) |
| Girgis (2010) <sup>142</sup>              | 20 | Mean 78 yr         | Subtrochanteric, diaphysis            | ALN (15), RIS (2)             | 5 for ALN, 3 for RIS | None                                                                                                 |                                  |                                         |                             | 4 (probable ADR) |
| Odvina (2010) <sup>143</sup>              | 13 |                    | Subtrochanteric and femoral shaft     | ALN (10), RIS (2)             | 2-11                 | SSBT (n = 5), low bone turnover (n = 1)                                                              | RA, PMR, MG                      | Prednisone (4), estrogen or TMX (n = 5) |                             | 4 (possible ADR) |

|                                    |     |                                  |                                  |               |                           |        |                                                                                        |                          |                                                                                                             |                  |
|------------------------------------|-----|----------------------------------|----------------------------------|---------------|---------------------------|--------|----------------------------------------------------------------------------------------|--------------------------|-------------------------------------------------------------------------------------------------------------|------------------|
| Napoli (2010) <sup>144</sup>       | 1   | Female, 56 yr                    | Femoral diaphysis                | ZOL           | 10                        | None   | MM, SCT, CKD                                                                           | Prednisone 60 mg         |                                                                                                             | 3 (possible ADR) |
| Wang (2010) <sup>145</sup>         | 63  | 10 male and 53 female            | Femoral                          |               |                           | None   |                                                                                        |                          |                                                                                                             | 3 (possible ADR) |
| Girgis (2010) <sup>146</sup>       | 17  |                                  | Femoral diaphysis                | ALN           |                           | None   |                                                                                        |                          |                                                                                                             | 3 (possible ADR) |
| Dell (2010) <sup>39</sup>          | 10  | Male and female, mean 72 ± 10 yr | Subtrochanteric and femoral      | ALN           | 5.5                       | None   |                                                                                        |                          |                                                                                                             | 5 (probable ADR) |
| Koh (2010) <sup>27</sup>           | 33§ | Female, mean 33 yr               | Femoral diaphysis and metaphysis | ALN 32, ZOL 1 | 4.5                       | None   |                                                                                        |                          | Delayed healing                                                                                             | 5 (probable ADR) |
| Kim (2011) <sup>31</sup>           | 10  | 85% female, mean 79.9 ± 8 yr     | Subtrochanteric and diaphyseal   | ALN, RIS      | HR > 2.0 if BP use > 5 yr | None   |                                                                                        | PPI, GCs, benzodiazepine |                                                                                                             | 4 (possible ADR) |
| Giusti (2011) <sup>147</sup>       | 10  |                                  | Subtrochanteric                  |               |                           | None   |                                                                                        | GC                       |                                                                                                             | 3 (possible ADR) |
| Puah (2011) <sup>148</sup>         | 1   | Female                           | Subtrochanteric and shaft        | ALN, IBN      | 2                         | None   | Breast cancer, asthma, DM                                                              | Letrozole, prednisone    | Developed 2 AFFs healed with BP discontinuation (5 yrs), resumed IBN for 7 months sustained 2 new AFFs      | 5 (probable ADR) |
| Gunawarde na (2011) <sup>149</sup> | 1   | Female, 67 yr                    | Subtrochanteric bilateral        | ALN           | 2                         | Normal | Pemphigus vulgaris (no secondary factors for bone loss), DXA T-score -2.0 (osteopenia) | Prednisone               | After first fracture, ALN was not discontinued, 2 yrs later another subtrochanteric fracture was identified | 5 (probable ADR) |

|                                  |     |                         |                                                                                            |               |    |      |                           |                       |                                                                               |                  |
|----------------------------------|-----|-------------------------|--------------------------------------------------------------------------------------------|---------------|----|------|---------------------------|-----------------------|-------------------------------------------------------------------------------|------------------|
| Gomberg (2011) <sup>150</sup>    | 1   | Female                  | Bilateral diaphyseal                                                                       | ALN           | 13 | None | Low bone turnover markers |                       | Vitamin-D deficiency treated with PTH(1-34) with fracture-healing             | 4 (possible ADR) |
| Koh (2011) <sup>151</sup>        | 48# | Female, mean 67 ± 10 yr | Lesions (fractures) were lateral and 10 cm from greater trochanter. Area of maximal stress | ALN, ZOL, RIS | 4  | None |                           |                       | Fractures occur in areas of maximal tensile stress                            | 4 (possible ADR) |
| Falkenberg (2011) <sup>152</sup> | 3   | Female                  |                                                                                            | ALN           | 5  | None |                           |                       | Hip fractures have declined by 35%                                            | 4 (possible ADR) |
| Curtin (2011) <sup>153</sup>     | 3   | Female                  |                                                                                            | ALN           | 3  | None | RA                        | Prednisone            | Presented as peri-prosthetic pain                                             | 4 (possible ADR) |
| Mulgund (2011) <sup>154</sup>    | 10  | Female                  |                                                                                            | ALN           | 8  | None | RA                        | Prednisone            | 2 bilateral fractures, remaining 8 had stress reaction in contralateral femur | 4 (possible ADR) |
| Ishizuna (2011) <sup>155</sup>   | 1   | Female                  | Subtrochanteric                                                                            | ZOL           | 2  | None | Breast cancer             | Letrozole, exemestane | Vertebral metastases                                                          | 4 (possible ADR) |
| Ahlman (2012) <sup>156</sup>     | 1   | Female                  | Subtrochanteric                                                                            | ALN           | 6  | None |                           |                       |                                                                               | 4 (possible ADR) |

\*BP = bisphosphonate, ADR = adverse drug reaction, ALN = alendronate, SSBT = severely suppressed bone turnover, DM = diabetes mellitus, CKD = chronic kidney disease, RA = rheumatoid arthritis, ZOL = zoledronate, PAM = pamidronate, MM = multiple myeloma, ONJ = osteonecrosis of the jaw, RIS = risedronate, CAD = coronary artery disease, MTX = methotrexate, IBN = ibandronate, COPD = chronic obstructive pulmonary disease, PPI = proton pump inhibitor, PMR = polymyalgia rheumatica, MG = myasthenia gravis, TMX = tamoxifen, SCT = stem cell transplant, HR = hazard ratio, GCs = glucocorticoids, AFF = atypical femoral fracture, DXA = dual x-ray absorptiometry, and PTH = parathyroid hormone. †Includes eight from Goh et al. ‡Includes ten from Lenart et al. §Includes the seventeen cases from Kwek et al. #Includes the thirty-three cases from Koh et al. (2010), which includes the seventeen cases from Kwek et al.

TABLE E-2 Adverse Drug Event (ADE) Probability Scale\*

To assess the adverse drug event, please answer the following questionnaire and give the pertinent score.

|                                                                                                               | Yes | No | Do Not Know | Score |
|---------------------------------------------------------------------------------------------------------------|-----|----|-------------|-------|
| 1. Are there previous conclusive reports on this reaction?                                                    |     |    |             |       |
| 2. Did the adverse event appear after the suspected drug was administered?                                    |     |    |             |       |
| 3. Did the adverse reaction improve when the drug was discontinued or a specific antagonist was administered? |     |    |             |       |
| 4. Did the adverse reaction reappear when the drug was re-administered?                                       |     |    |             |       |
| 5. Are there alternative causes (other than the drug) that could on their own have caused the reaction?       |     |    |             |       |
| 6. Did the reaction reappear when the placebo was administered?                                               |     |    |             |       |
| 7. Was the drug detected in the blood (or other fluids) in concentrations known to be toxic?                  |     |    |             |       |
| 8. Was the reaction more severe when the dose was increased?                                                  |     |    |             |       |
| 9. Did the patient have a similar reaction to the same or similar drugs in any previous exposure?             |     |    |             |       |
| 10. Was the adverse event confirmed by objective evidence?                                                    |     |    |             |       |
|                                                                                                               |     |    | Total score |       |

\*Reprinted by permission from Macmillan Publishers Ltd: Clin Pharmacol Ther. 1981 Aug;30(2):239-45. Naranjo CA, Busto U, Sellers EM, Sandor P, Ruiz I, Roberts EA, Janecek E, Domecq C, Greenblatt DJ. A method for estimating the probability of adverse drug reactions. Copyright 1981.

<http://www.nature.com/clpt/index.html>.

## References

### 119.

Husada G, Libberecht K, Peeters T, Populaire J. Bilateral mid-diaphyseal femoral stress fractures in the elderly. *Eur J Trauma*. 2005;31:68-71.

### 120.

Schneider JP. Should bisphosphonates be continued indefinitely? An unusual fracture in a healthy woman on long-term alendronate. *Geriatrics*. 2006 Jan;61(1):31-3.

### 121.

Lee P, van der Wall H, Seibel MJ. Looking beyond low bone mineral density: multiple insufficiency fractures in a woman with post-menopausal osteoporosis on alendronate therapy. *J Endocrinol Invest*. 2007 Jul-Aug;30(7):590-7.

### 122.

Demiralp B, Ilgan S, Ozgur Karacalioglu A, Cicek EI, Yildirim D, Erler K. Bilateral femoral insufficiency fractures treated with inflatable intramedullary nails: a case report. *Arch Orthop Trauma Surg*. 2007 Sep;127(7):597-601. Epub 2007 Jun 16.

### 123.

Lee P, Seibel MJ. More on atypical fractures of the femoral diaphysis. *N Engl J Med*. 2008 Jul 17;359(3):317; author reply 317-8.

### 124.

Kwek EB, Goh SK, Koh JS, Png MA, Howe TS. An emerging pattern of subtrochanteric stress fractures: a long-term complication of alendronate therapy? *Injury*. 2008 Feb;39(2):224-31. Epub 2008 Jan 28.

### 125.

Wernecke G, Namdari S, DiCarlo EF, Schneider R, Lane J. Case report of spontaneous, nonspinal fractures in a multiple myeloma patient on long-term pamidronate and zoledronic acid. *HSS J*. 2008;4(2):123-7. Epub 2008 Jul 16. Erratum in: *HSS J*. 2009 Sep;5(2):204. Namdari, Surena [corrected to Namdari, Surena].

### 126.

Sayed-Noor AS, Sjöden GO. Subtrochanteric displaced insufficiency fracture after long-term alendronate therapy—a case report. *Acta Orthop*. 2008 Aug;79(4):565-7.

### 127.

Bush L, Chew F. Subtrochanteric femoral insufficiency fracture following bisphosphonate therapy for osseous metastases. *Radiol Case Rep*. 2008;2:232.

**128.**

Lenart BA, Lorich DG, Lane JM. Atypical fractures of the femoral diaphysis in postmenopausal women taking alendronate. *N Engl J Med.* 2008 Mar 20;358(12):1304-6.

**129.**

Grasko JM, Herrmann RP, Vasikaran SD. Recurrent low-energy femoral shaft fractures and osteonecrosis of the jaw in a case of multiple myeloma treated with bisphosphonates. *J Oral Maxillofac Surg.* 2009 Mar;67(3):645-9.

**130.**

Glennon DA. Subtrochanteric stress fractures in six patients on long term bisphosphonate therapy: a case series. *Bone.* 2009;44 (Suppl 1):S77-8.

**131.**

Sayed-Noor AS, Sjöden GO. Case reports: two femoral insufficiency fractures after long-term alendronate therapy. *Clin Orthop Relat Res.* 2009 Jul;467(7):1921-6. Epub 2009 Feb 6.

**132.**

Goddard MS, Reid KR, Johnston JC, Khanuja HS. Atraumatic bilateral femur fracture in long-term bisphosphonate use. *Orthopedics.* 2009 Aug;32(8). pii: orthosupersite.com/view.asp?rID=41933. doi: 10.3928/01477447-20090624-27.

**133.**

Capeci CM, Tejwani NC. Bilateral low-energy simultaneous or sequential femoral fractures in patients on long-term alendronate therapy. *J Bone Joint Surg Am.* 2009 Nov;91(11):2556-61.

**134.**

Lee JK. Bilateral atypical femoral diaphyseal fractures in a patient treated with alendronate sodium. *Int J Rheum Dis.* 2009 Jul;12(2):149-54.

**135.**

Leung F, Lau TW, To M, Luk KD, Kung AW. Atypical femoral diaphyseal and subtrochanteric fractures and their association with bisphosphonates. *BMJ Case Rep.* 2009;2009. pii: bcr10.2008.1073. ePub 2009 Mar 5.

**136.**

Schneider JP. Bisphosphonates and low-impact femoral fractures: current evidence on alendronate-fracture risk. *Geriatrics.* 2009 Jan;64(1):18-23.



**137.**

Armamento-Villareal R, Napoli N, Diemer K, Watkins M, Civitelli R, Teitelbaum S, Novack D. Bone turnover in bone biopsies of patients with low-energy cortical fractures receiving bisphosphonates: a case series. *Calcif Tissue Int.* 2009 Jul;85(1):37-44. Epub 2009 Jun 23.

**138.**

Cermak K, Shumelinsky F, Alexiou J, Gebhart MJ. Case reports: subtrochanteric femoral stress fractures after prolonged alendronate therapy. *Clin Orthop Relat Res.* 2010 Jul;468(7):1991-6. Epub 2009 Dec 18.

**139.**

Bunning RD, Rentfro RJ, Jelinek JS. Low-energy femoral fractures associated with long-term bisphosphonate use in a rehabilitation setting: a case series. *PM R.* 2010 Jan;2(1):76-80.

**140.**

Edwards MH, McCrae FC, Young-Min SA. Alendronate-related femoral diaphysis fracture--what should be done to predict and prevent subsequent fracture on the contralateral side? *Osteoporos Int.* 2010 Apr;21(4):701-3. Epub 2009 Jun 27.

**141.**

Isaacs JD, Shidiak L, Harris IA, Szomor ZL. Femoral insufficiency fractures associated with prolonged bisphosphonate therapy. *Clin Orthop Relat Res.* 2010 Dec;468(12):3384-92. Epub 2010 Aug 31.

**142.**

Girgis C, Sher D, Seibel MJ. Atypical femoral fractures are associated with bisphosphonate use. Presented at the Annual Meeting of the American Society for Bone and Mineral Research. 2010 Sep 16-20; Toronto, CA.

**143.**

Odvina CV, Levy S, Rao S, Zerwekh JE, Rao DS. Unusual mid-shaft fractures during long-term bisphosphonate therapy. *Clin Endocrinol (Oxf).* 2010 Feb;72(2):161-8. Epub 2009 Mar 19.

**144.**

Napoli N, Novack D, Armamento-Villareal R. Bisphosphonate-associated femoral fracture: implications for management in patients with malignancies. *Osteoporos Int.* 2010 Apr;21(4):705-8. Epub 2009 Aug 11.

**145.**

Wang JZ. Divergent trends between typical and atypical hip fractures and prevalence of bisphosphonate use in the US elderly, 1996-2007. Presented at the Annual Meeting of the American Society for Bone and Mineral Research; 2010 Sep 16-20; Toronto, CA.

**146.**

Girgis CM, Seibel MJ. Atypical femur fractures: a complication of prolonged bisphosphonate therapy? *Med J Aust.* 2010 Aug 16;193(4):196-8.

**147.**

Giusti A, Hamdy NA, Dekkers OM, Ramautar SR, Dijkstra S, Papapoulos SE. Atypical fractures and bisphosphonate therapy: a cohort study of patients with femoral fracture with radiographic adjudication of fracture site and features. *Bone.* 2011 May 1;48(5):966-71. Epub 2010 Dec 31.

**148.**

Puah KL, Tan MH. Bisphosphonate-associated atypical fracture of the femur: Spontaneous healing with drug holiday and re-appearance after resumed drug therapy with bilateral simultaneous displaced fractures—a case report. *Acta Orthop.* 2011 Jun;82(3):380-2. Epub 2011 May 11.

**149.**

Gunawardena I, Baxter M, Rasekh Y. Bisphosphonate-related subtrochanteric femoral fractures. *Am J Geriatr Pharmacother.* 2011 Jun;9(3):194-8.

**150.**

Gomberg SJ, Wustrack RL, Napoli N, Arnaud CD, Black DM. Teriparatide, vitamin D, and calcium healed bilateral subtrochanteric stress fractures in a postmenopausal woman with a 13-year history of continuous alendronate therapy. *J Clin Endocrinol Metab.* 2011 Jun;96(6):1627-32. Epub 2011 Mar 23.

**151.**

Koh JS, Goh SK, Png MA, Ng AC, Howe TS. Distribution of atypical fractures and cortical stress lesions in the femur: implications on pathophysiology. *Singapore Med J.* 2011 Feb;52(2):77-80.

**152.**

Falkenberg MP. Atypical femoral fractures: a complication of prolonged bisphosphonate therapy? *Med J Aust.* 2011 Jan 17;194(2):102-3; author reply 103.

**153.**

Curtin BM, Fehring TK. Bisphosphonate fractures as a cause of painful total hip arthroplasty. *Orthopedics.* 2011 Dec 6;34(12):e939-44. doi: 10.3928/01477447-20111021-36.

**154.**

Mulgund M, Beattie KA, Anaspure R, Matsos M, Patel A, Adachi JD. Atypical femoral fractures in patients taking longterm alendronate. *J Rheumatol.* 2011 Dec;38(12):2686-7.

**155.**

Ishizuna K, Ota D, Fukuuchi A, Teraoka M, Fujii A, Mori M, Nishi T. A case of femoral diaphyseal fracture after long-term treatment with zoledronic acid. *Breast Cancer.* 2011 Oct 19. [Epub ahead of print]

**156.**

Ahlman MA, Rissing MS, Gordon L. Evolution of bisphosphonate-related atypical fracture retrospectively observed with DXA scanning. *J Bone Miner Res.* 2012 Feb;27(2):496-8.

## Appendix 1 Pharmacovigilance Analysis Tools

A principal objective of postmarketing surveillance with use of spontaneous, post-approval adverse drug event reports is to provide a “safety net” that will catch rare and unexpected adverse drug events that may have been missed during the clinical development program. The size and scope of spontaneous reporting systems are desirable properties from the perspective of sensitivity. The downside of such large databases is that they are uncontrolled and contain millions of drug-event combinations, that unassisted human screening of the database becomes problematic.

Adverse drug effects are manifold and heterogeneous. Many situations may hamper the detection of early warning signs (signal detection) of adverse events. Current pharmacovigilance is based predominantly on spontaneous reporting and is mainly helpful in detecting type-B effects (rare, often allergic or idiosyncratic reactions that are usually unrelated to dosage, serious, unexpected, and unpredictable) and unusual type-A effects (those effects that are related to the pharmacologic effects of the drug and are dosage-related).

Those performing pharmacovigilance sometimes perform quantitative analyses of data from spontaneous reporting systems as a supplement to qualitative examination of individual case reports. For example, for a given drug, one can calculate a disproportionality measure: the frequency of a specific event relative to the frequency of all events for that drug and divide this value by the corresponding value for other drugs. If the frequencies are expressed as proportions, then this ratio is the proportional reporting ratio (PRR) if they are expressed as odds, then this ratio is the reporting odds ratio (ROR). It is widely recognized that, because of inconsistencies in adverse event reporting, disproportionality analyses are modest surrogates for controlled epidemiologic studies.

### *Assessment of Data Mining Methods*

#### **Proportional Reporting Ratio (PRR)<sup>19</sup>**

The PRR approach was first described by Finney and further developed recently by Evans, Waller, and Davis. To describe the method, suppose that we are interested in developing a measure for the strength of the association between drug  $i$  and COSTART  $j$ . Let “ $a$ ” denote  $n_{ij}$ , the number of reports for a given drug-COSTART combination, “ $b$ ” denote the number of times that any other COSTART (coding symbol for a thesaurus of adverse reaction terms) is reported for drug  $i$ , “ $c$ ” denote the number of times that COSTART <sub>$ij$</sub>  is reported for all other drugs, and “ $d$ ” denote the number of reports for any other drug-COSTART combination.

These values may be depicted in a contingency table:

|                    | COSTART j | All Other COSTARTs |
|--------------------|-----------|--------------------|
| Vaccine i          | a         | b                  |
| All other vaccines | c         | d                  |

In this contingency table notation, the PRR signal for vaccine i and COSTART J is

$$PRR_{ij} = \frac{a/(a+b)}{c/(c+d)}$$

This fraction is the proportion of COSTART j reports for drug i divided by the proportion of COSTART j reports for all other drugs. A large PRR for a specific drug-COSTART pair indicates that the COSTART has been disproportionately reported for that drug compared with all of the other drugs in the FAERS database.

### Empirical Bayes Geometric Mean (EBGM)

The empirical Bayes model assumes that the counts  $n_{ij}$  in each cell are random variables from Poisson distributions with unknown means  $\mu_{ij}$  where the  $\mu_{ij}$  are themselves random variables with a common distribution. This common distribution is usually taken to be a mixture of two gamma distributions, one centered at the null value corresponding to a coincidental adverse event and the other more dispersed and centered at a value corresponding to a true causal relationship between the drug and the adverse event. There are many alternative models that lead to similar results; the preceding one is a simple mixture model with two gamma components, one of which is highly dispersed and the other of which is concentrated near a value of 1. Simple alternative models assume a mixture of different distributions and use the observed counts  $n_{ij}$  to estimate the parameters, but one could also consider nonparametric techniques that allow the data to determine the shapes of the mixture components. This kind of framework, called a hierarchical model, is widely used in Bayesian practice. It allows one to exploit a simple Bayesian computational structure for inference while avoiding the need to choose a subjective prior for the unknown distribution of  $\mu_{ij}$ . Formally, the measure corresponding to drug i and COSTAR j is given by  $\log_2$  EBGM<sub>ij</sub> = E[log<sub>2</sub>( $\mu_{ij}/E_{ij}$ ) |  $\eta_{ij}$ ], where the right-hand side of the equation denotes the expectation operator and  $E_{ij}$  is given by  $(a+b)(a+c)/(a+b+c+d)$ .

In the notation in the PRR section, and for the drug-COSTART pair of interest,  $i$  and  $j$  correspond to cell  $E_{ij}$ . This expression calculates the expected value of the base-2 logarithm of the ratio between the estimated reporting ratio and the ratio under the assumption of no causal relationship, given the observed count of the spontaneous reports for that drug and that COSTART. A large value suggests that drug  $i$  might provoke the adverse event described by COSTART  $j$ . The practical effect of this hierarchical model framework is that it “shrinks” the estimates of the reporting ratio parameters in the Poisson distributions toward each other, thereby reducing the effect of sampling variation in the data. The shrinkage is greatest when  $E_{ij}$  is small and/or  $n_{ij}/E_{ij}$  is small, which typically occurs when  $a$  or  $b$  is small. Another advantage is that the model preserves the interpretability of the parameters and their estimates. The main drawback of this approach is that it is computationally intensive, taking several minutes to run and requiring investment in well-tested, special-purpose code. The computational burden depends on the number of rows and columns in the matrix, not on the number of report, so from the standpoint of scaling concerns, this performance is adequate for all foreseeable FAERS applications<sup>23</sup>.

#### **Naranjo Scale (Table E-2)**

The Naranjo scale provides a weighted score (reflecting the probability that an adverse drug reaction exists) for each of the components that must be considered in establishing a causal relationship between a drug and an adverse drug effect (temporal sequence). The Naranjo scale has high inter-rater reliability (83% to 92% agreement,  $\kappa = 0.69$  to  $0.89$ ,  $r = 0.91$  to  $0.95$ , estimated  $r = 0.92$ ) and high intra-rater reliability (80% to 97% agreement,  $\kappa = 0.64$  to  $0.95$ ,  $r = 0.91$  to  $0.98$ ). This adverse drug reaction probability scale has contextual, content, and concurrent validity<sup>22</sup>. This adverse drug reaction probability scale is used in pharmacovigilance studies. Possible scores range from  $-4$  to  $13$ , with  $\leq 0$  considered “doubtful,”  $1$  to  $4$  considered “possible,”  $5$  to  $8$  considered “probable,” and  $9$  or greater considered “definite.”
